# Supplementary material for: Porous carbon nitride photocatalysts prepared by calcination of hydroxyl-substituted melamine derivatives
Source: Royal Society of Chemistry journal article supplement (doi:10.1039/d5cc04808g), 2025-11-21
Supplement: d5cc04808g1.pdf [file d5cc04808g1.pdf]

Electronic Supplementary Information (ESI†)

**Porous carbon nitride photocatalysts prepared by calcination of  
hydroxyl-substituted melamine derivatives**

Kazuki Miyata, Yasuhiro Shiraishi,\* Satoshi Ichikawa, Shunsuke Tanaka, and Takayuki Hirai

shiraishi.yasuhiro.es@osaka-u.ac.jp

**CONTENTS**

|                                                                               | Page |
|-------------------------------------------------------------------------------|------|
| <b>Methods</b> .....                                                          | 2    |
| <b>Fig. S1</b> Powder XRD patterns.....                                       | 4    |
| <b>Fig. S2</b> FT-IR spectra .....                                            | 4    |
| <b>Fig. S3</b> STEM images .....                                              | 5    |
| <b>Fig. S4</b> TEM images and size distributions of Pt particles.....         | 6    |
| <b>Fig. S5</b> SEM images.....                                                | 7    |
| <b>Fig. S6</b> EELS spectra.....                                              | 8    |
| <b>Fig. S7</b> DDMAS/ <sup>13</sup> C-NMR spectra.....                        | 9    |
| <b>Fig. S8</b> XPS spectra.....                                               | 10   |
| <b>Fig. S9</b> ESR spectra.....                                               | 11   |
| <b>Fig. S10</b> Tauc plots.....                                               | 12   |
| <b>Fig. S11</b> Mott-Schottky plots.....                                      | 13   |
| <b>Fig. S12</b> TG-DTA curves.....                                            | 14   |
| <b>Fig. S13</b> FD-MS spectra.....                                            | 15   |
| <b>Fig. S14</b> EIS Nyquist plots .....                                       | 16   |
| <b>Fig. S15</b> Photocurrent response .....                                   | 16   |
| <b>Fig. S16</b> DR UV-vis spectra.....                                        | 17   |
| <b>Table S1</b> Φ <sub>AQY</sub> of CN(AD) and early reported CN powders..... | 18   |
| <b>References</b> .....                                                       | 20   |

## Methods

### Synthesis of catalysts

The CN powders were prepared by calcination of the respective precursors: 1 g of each of the respective precursors (MM, AN, AD, or cyanuric acid) was put in an aluminum oxide crucible. The crucible was left in a muffle furnace and heated to 550 °C under N<sub>2</sub> flow (0.2 L min<sup>-1</sup>), with a heating rate of 2 °C min<sup>-1</sup> and a holding time of 3 h.

### Photocatalytic H<sub>2</sub> generation

Photocatalytic H<sub>2</sub> generation was performed in a quartz reaction vessel connected to a closed gas-circulation system.<sup>1,2</sup> Catalyst (50 mg) was added to 10 vol% triethanolamine (TEOA) solution (100 mL) and ultrasonicated for 15 min. The mixture and a H<sub>2</sub>PtCl<sub>6</sub>·6H<sub>2</sub>O solution (1.33 mg in 136 µL water) were put into the reaction vessel. The vessel was connected to the gas-circulation system and evacuated to 2 kPa. The Ar gas purging and evacuation cycles were repeated three times, and Ar gas (50 kPa) was finally filled. The solution was magnetically stirred and photoirradiated with visible light ( $\lambda > 420$  nm, solar simulator with a cut-off filter) at room temperature (298 K). The amounts of H<sub>2</sub> were quantified using a GC-8A gas chromatograph equipped with TCD (Shimadzu). The apparent quantum yield ( $\Phi_{AQY}$ ) for H<sub>2</sub> generation was determined by the irradiation of monochromated light using the following equation.

$$\Phi_{AQY}[\%] = \frac{[\text{H}_2 \text{ evolved } (\mu\text{mol})] \times 2}{[\text{photon number entered into the reaction system}]} \times 100$$

### Electrochemical measurements

The electrochemical measurements were performed at room temperature in 0.1 M Na<sub>2</sub>SO<sub>4</sub> (pH 6, 70 mL). The Pt coil and Ag/AgCl electrodes were used as the counter and reference electrodes, respectively. The working electrodes were prepared as follows: the catalyst ink was made by ultrasonication of a mixture of pure water (2 mL), catalyst (20 mg), 5 wt% Nafion dispersion (200 µL), and 2-propanol (1 mL). The ink (10 µL) was put onto a FTO glass (catalyst area: 0.5 cm × 0.5 cm square) and dried at room temperature. The obtained FTO glasses were left in a muffle furnace at 200 °C for 30 min under N<sub>2</sub> atmosphere. The exposed FTO surface was covered with an epoxy resin, affording the catalyst-loaded FTO working electrode. Prior to measurements, cyclic voltammetry (CV) cycles (−0.2 ~ 0.6 V (vs. Ag/AgCl)) were performed for 5 cycles for cleaning the catalyst surface. EIS measurements were performed on a HZ-Pro S2A system (Meiden Hokuto). The Mott-Schottky plots and photocurrent response measurements were performed on a HZ-7000 system (Meiden Hokuto). All potential values were referred to the reversible hydrogen electrode (RHE) using the following equation.<sup>3</sup>

$$E(\text{vs. RHE}) = E(\text{vs. Ag/AgCl}) + 0.1976 + 0.0591 \times \text{pH}$$

$$(E(\text{Ag/AgCl (ref.)}) = 0.1976 \text{ V vs. NHE at } 25^\circ\text{C})$$

## Analysis

The powder XRD patterns were recorded on a PANalytical XPert PRO with a Cu-K $\alpha$  radiation. DR UV-vis spectra were measured on a UV-vis spectrophotometer (JASCO Corp.; V-750). FT-IR spectra were measured on a JASCO FT/IR-6100 by transmission method. The TEM and STEM images and EELS spectra were obtained using a JEOL ARM200F at an accelerating voltage of 200 kV. ICP-AES analysis was performed on a SPS7800 plasma spectrometer (SII). SEM observations were performed using S-5000H microscope (HITACHI). The N<sub>2</sub> adsorption/desorption measurements were performed at 77 K using BELSORP MINI X (Microtrac BEL). The specific surface area was determined on the basis of the Brunauer–Emmett–Teller (BET) method, and the pore size distributions were determined based on the Barrett–Joyner–Halenda (BJH) methods. XPS spectra were obtained on JPS-9010MX (JEOL) spectrometer with Mg K $\alpha$  radiation as the energy source. Solid-state <sup>13</sup>C-NMR spectra were measured using Bruker AVANCE400WB at 13 kHz.<sup>4</sup> ESR spectra were measured using JEOL RESONANCE JES X320 at room temperature under dark conditions. CN powders were preheated at 80 °C for 2 h under vacuum before the measurements. The TG-DTA curves were obtained on a DTG-60H system (Shimadzu) using the coverable aluminum oxide sample cell. The cell was heated to 550 °C with a heating rate of 10 °C min<sup>-1</sup> under Ar flow (50 mL min<sup>-1</sup>). FD-MS analysis was performed using JEOL JMS-700.

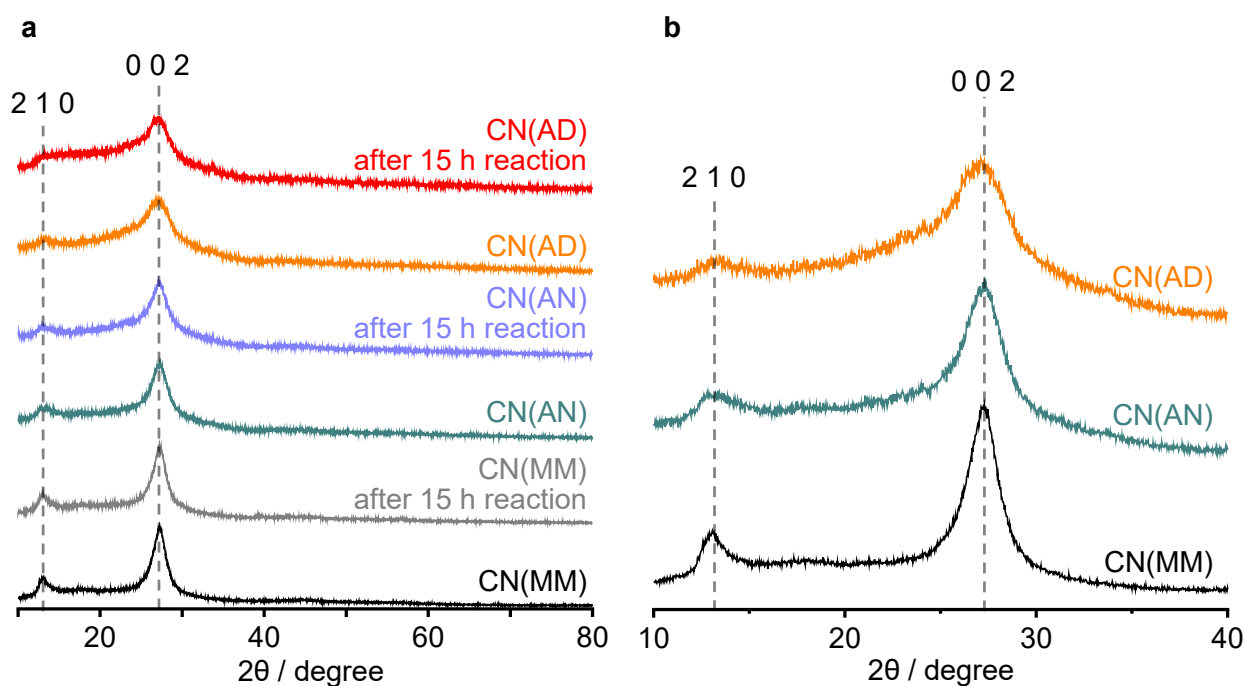

**Fig. S1** (a) XRD patterns of CN powders and (b) their enlarged views.

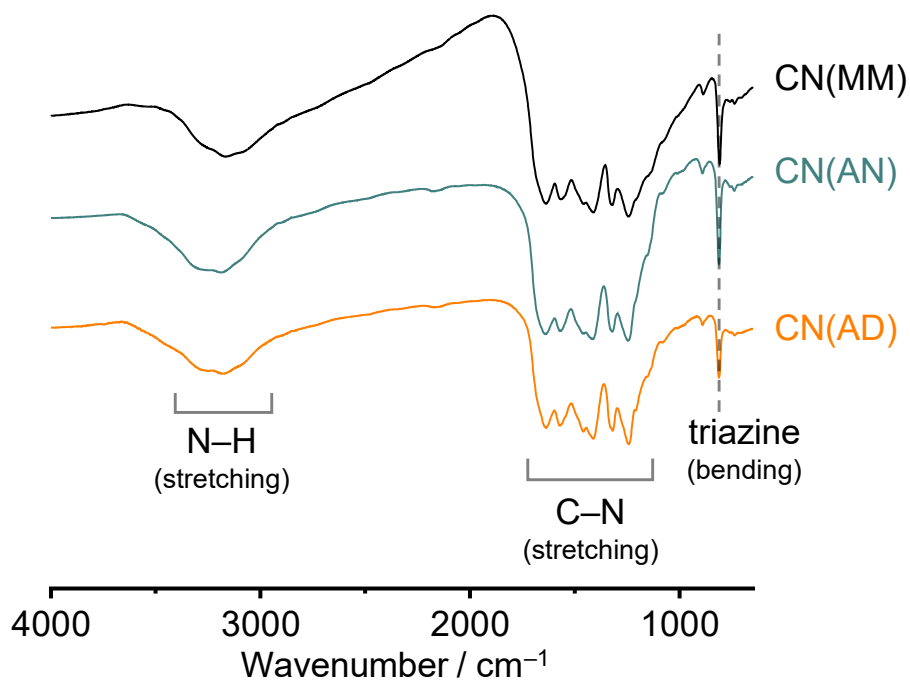

**Fig. S2** FT-IR spectra of CN powders.

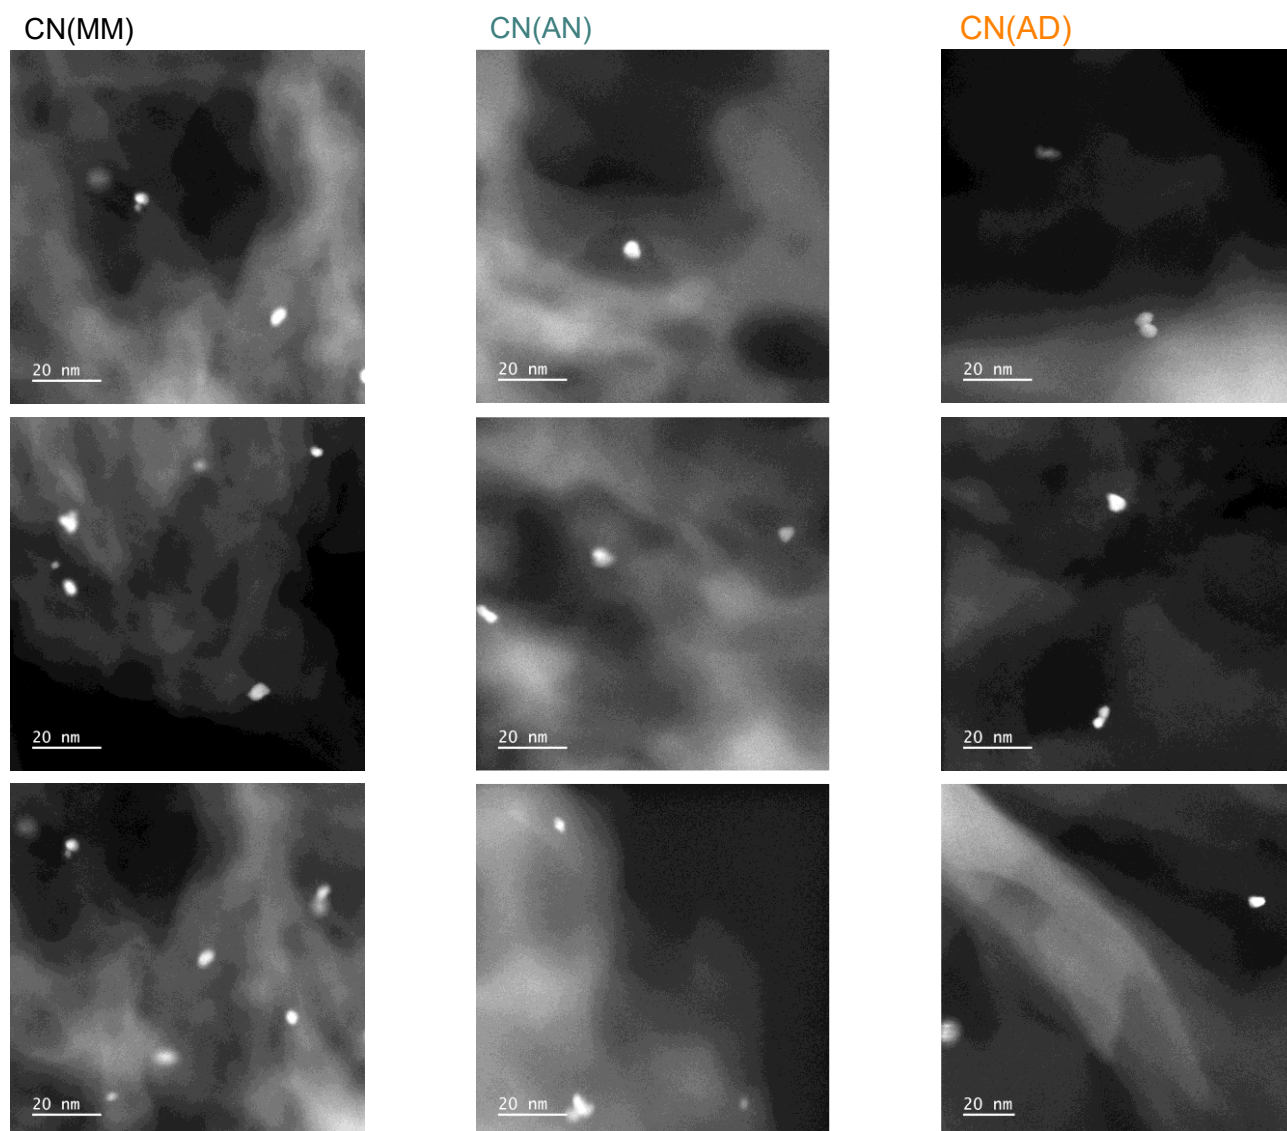

**Fig. S3** Annular dark field STEM images of Pt particles loaded on CN powders.

CN(MM)

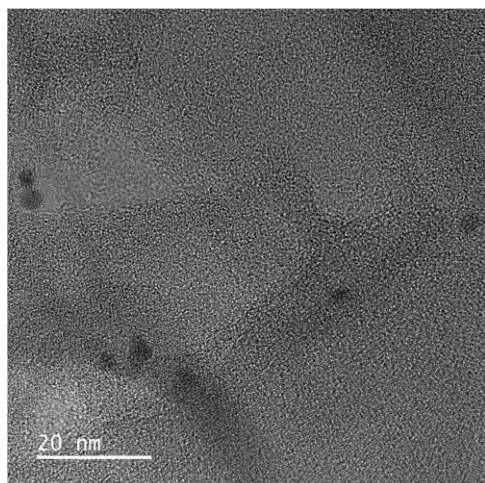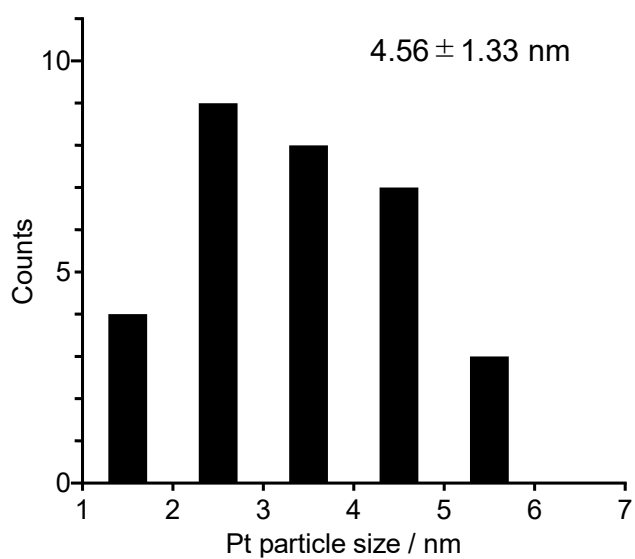

CN(AN)

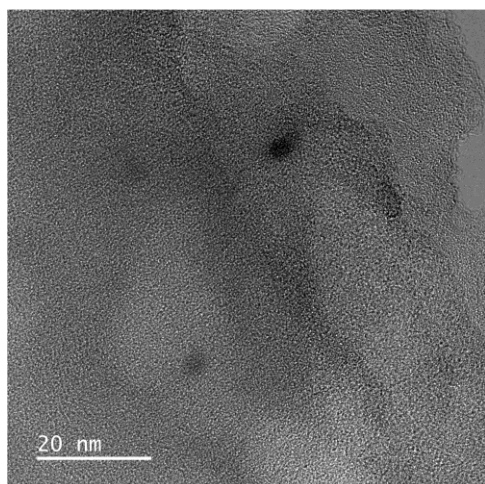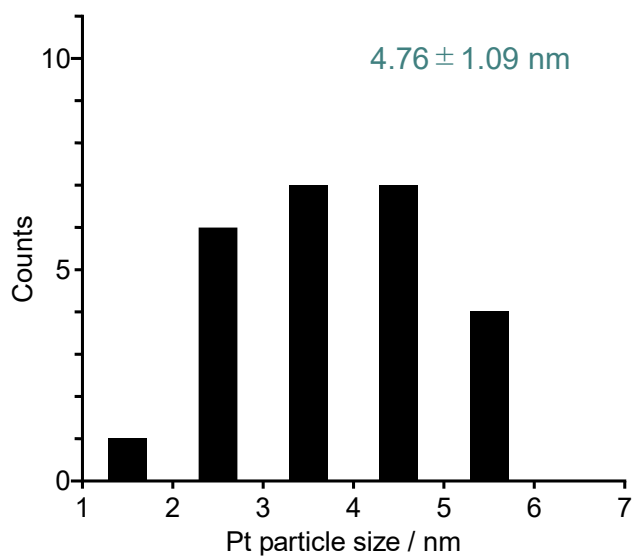

CN(AD)

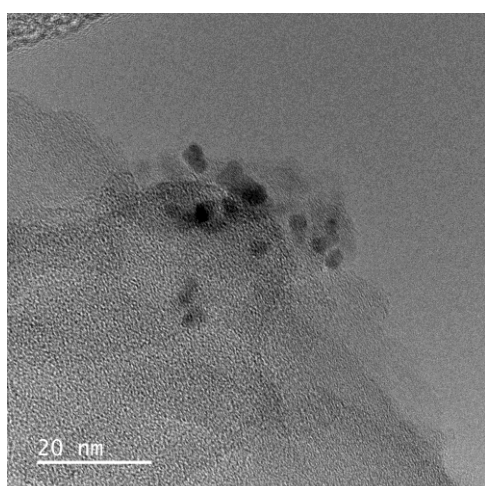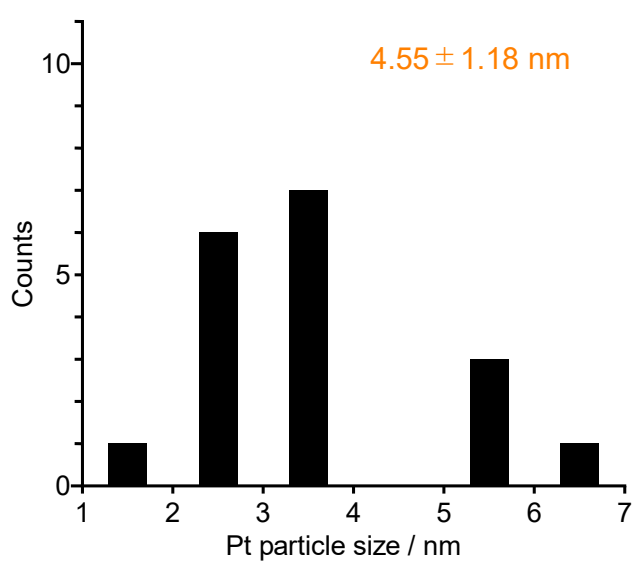

**Fig. S4** TEM images and size distributions of Pt particles loaded on CN powders.



CN(MM)

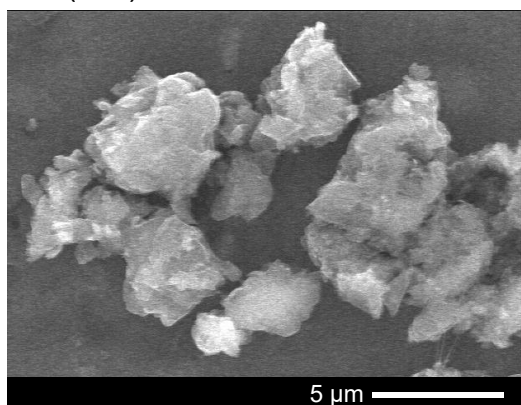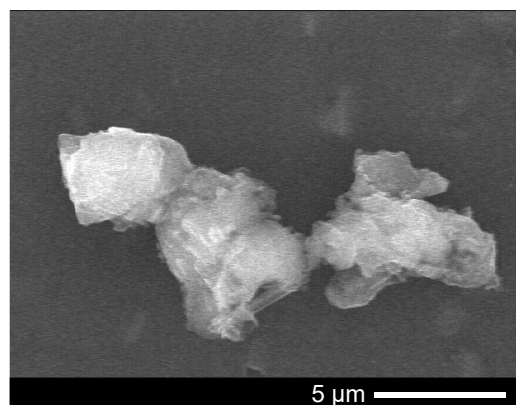

CN(AN)

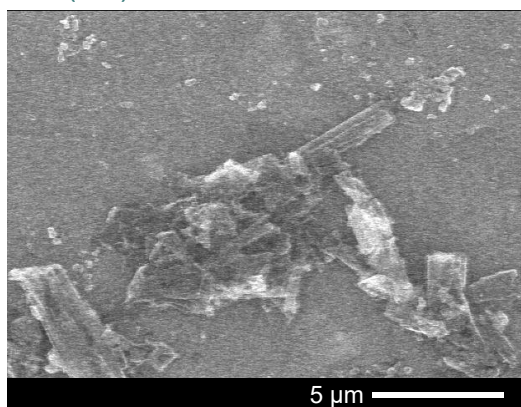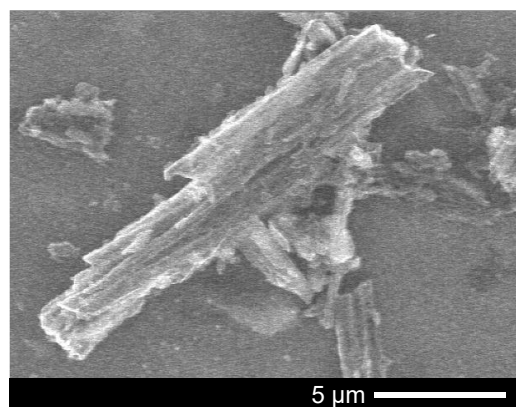

CN(AD)

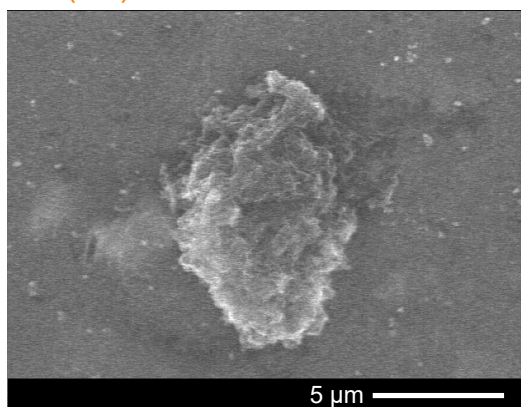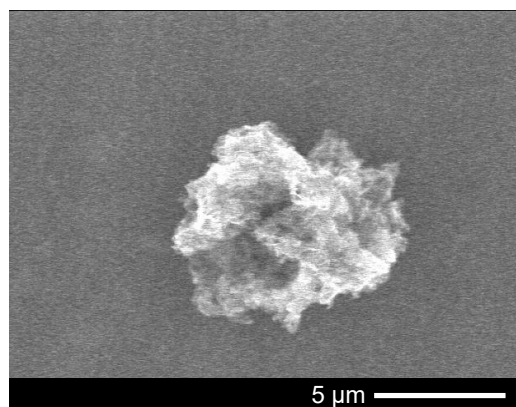

**Fig. S5** SEM images of CN powders.

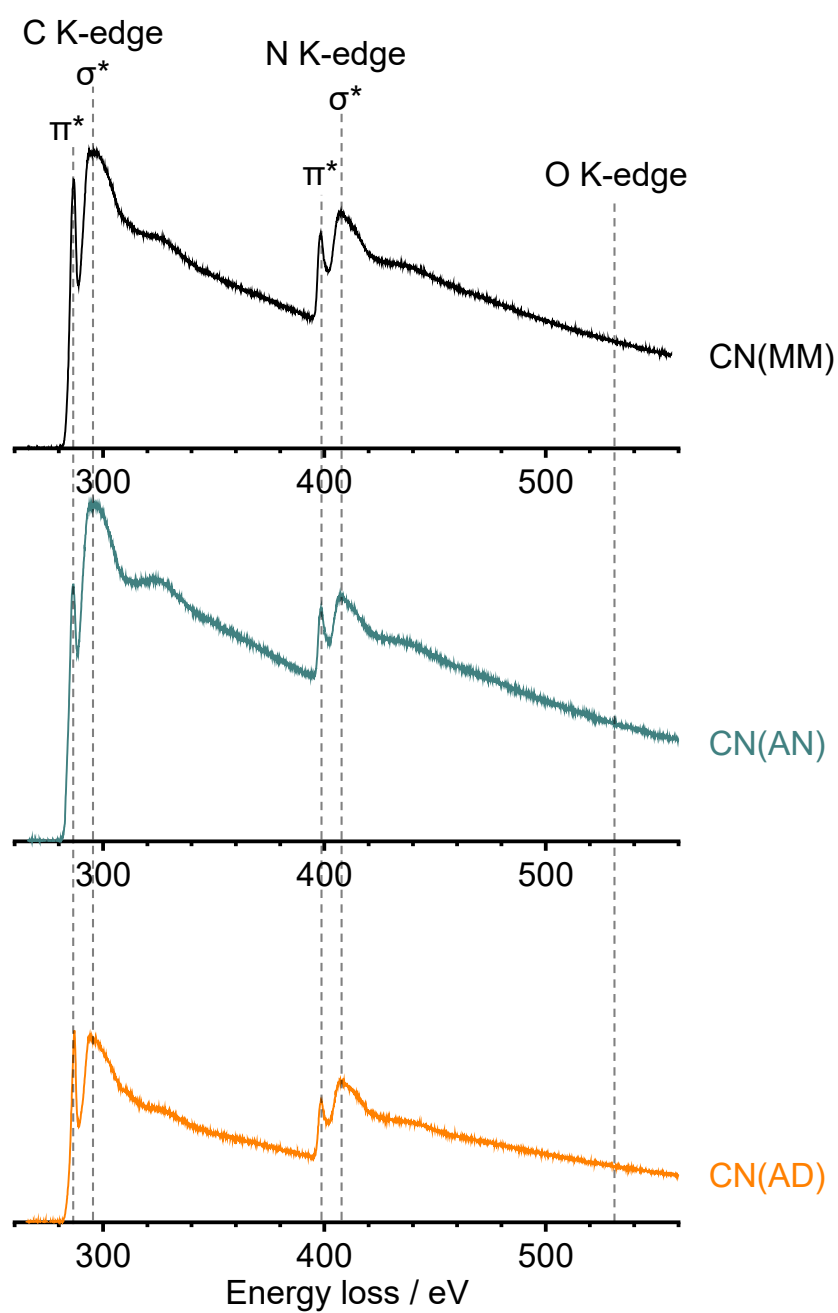

**Fig. S6** C K-edge and N K-edge EELS spectra of CN powders.



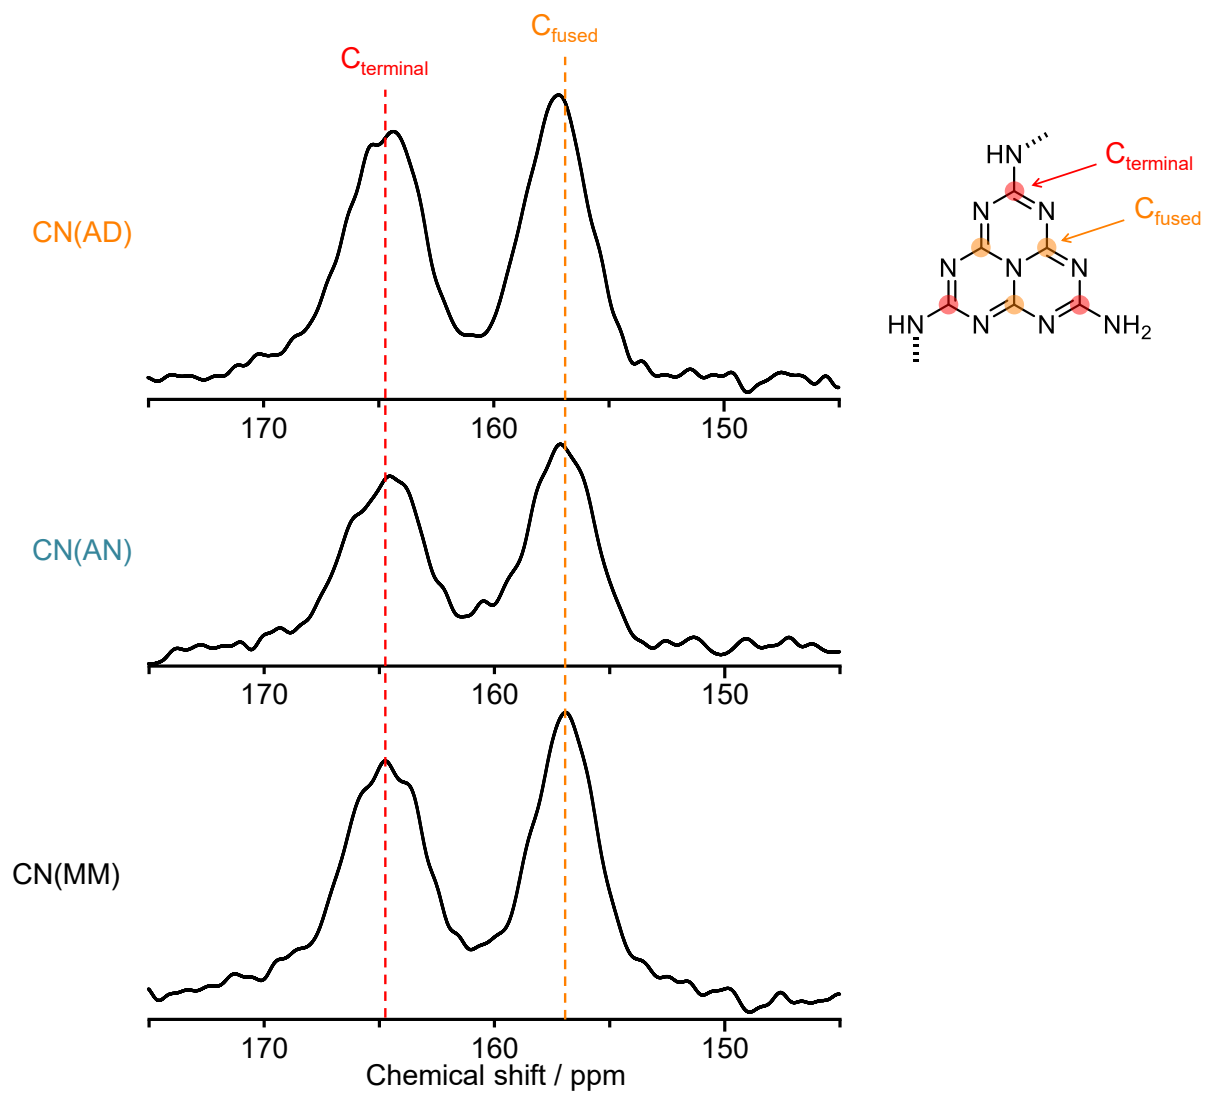

**Fig. S7** Solid-state DDMAS/ $^{13}\text{C}$ -NMR spectra of CN powders.

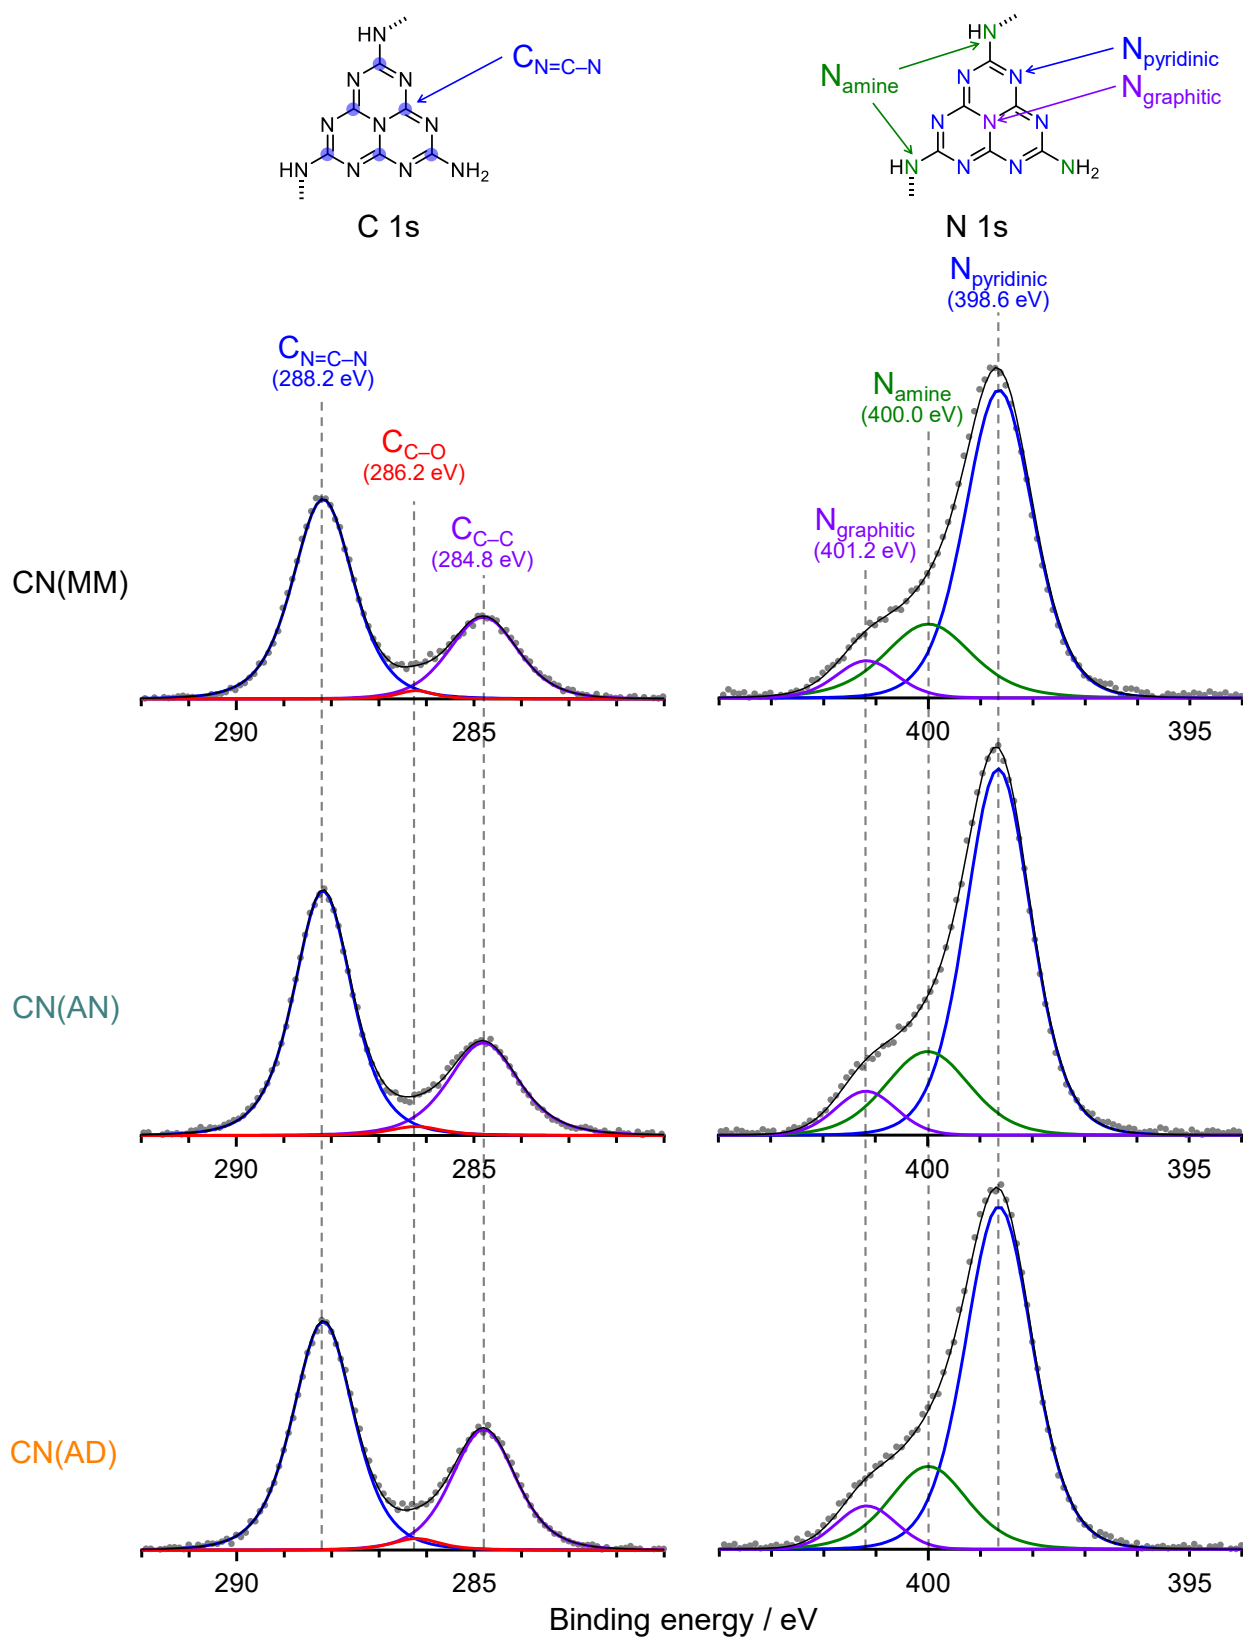

**Fig. S8** C 1s and N 1s XPS spectra of respective CN powders.<sup>5-7</sup> The components in the C 1s spectra at 284.8 and 286.2 eV correspond to C–C and C–O, respectively, which originate from the background (carbon tapes).

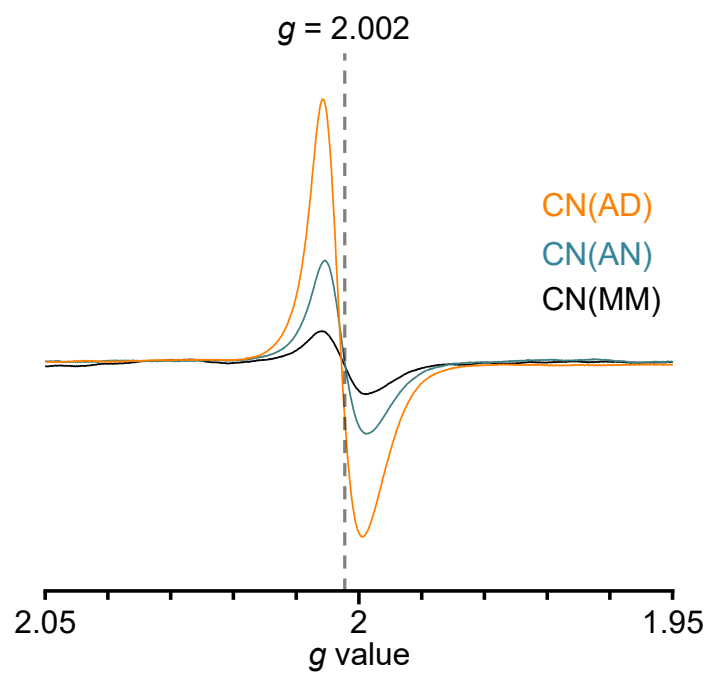

**Fig. S9** ESR spectra of CN powders measured in the dark.

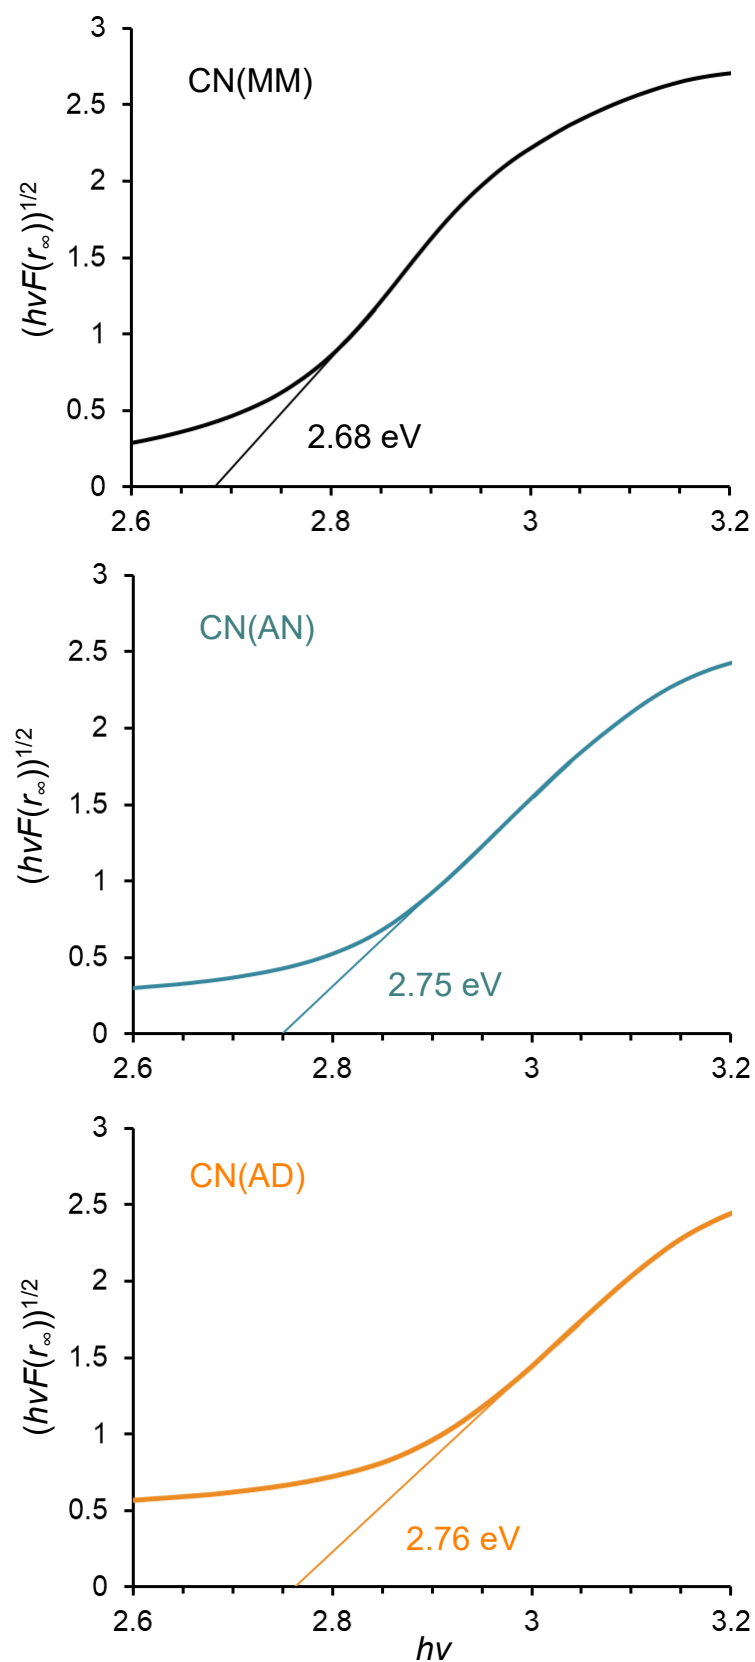

**Fig. S10** Tauc plots of CN powders.

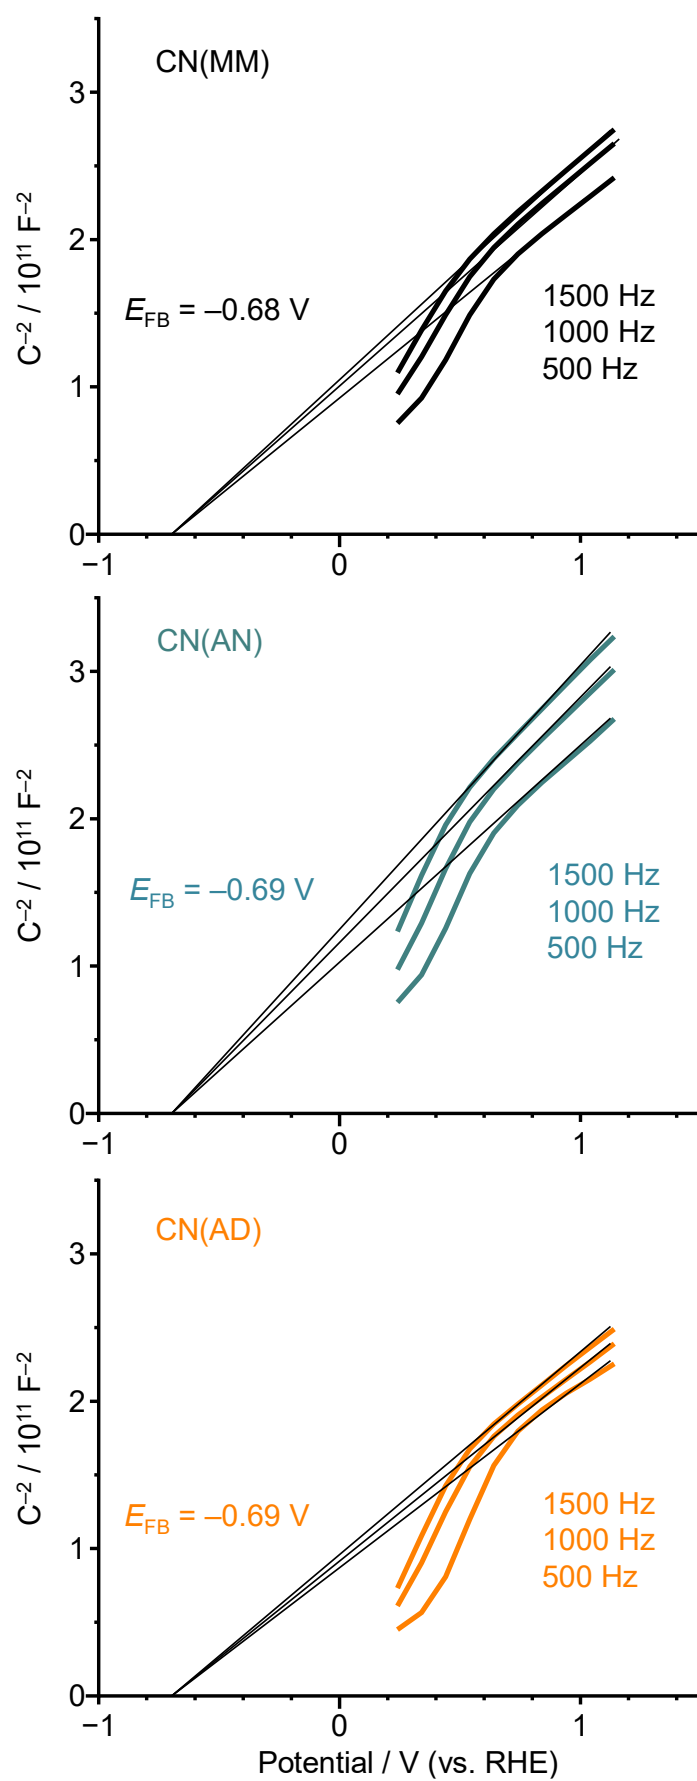

**Fig. S11** Mott-Schottky plots of CN powders.

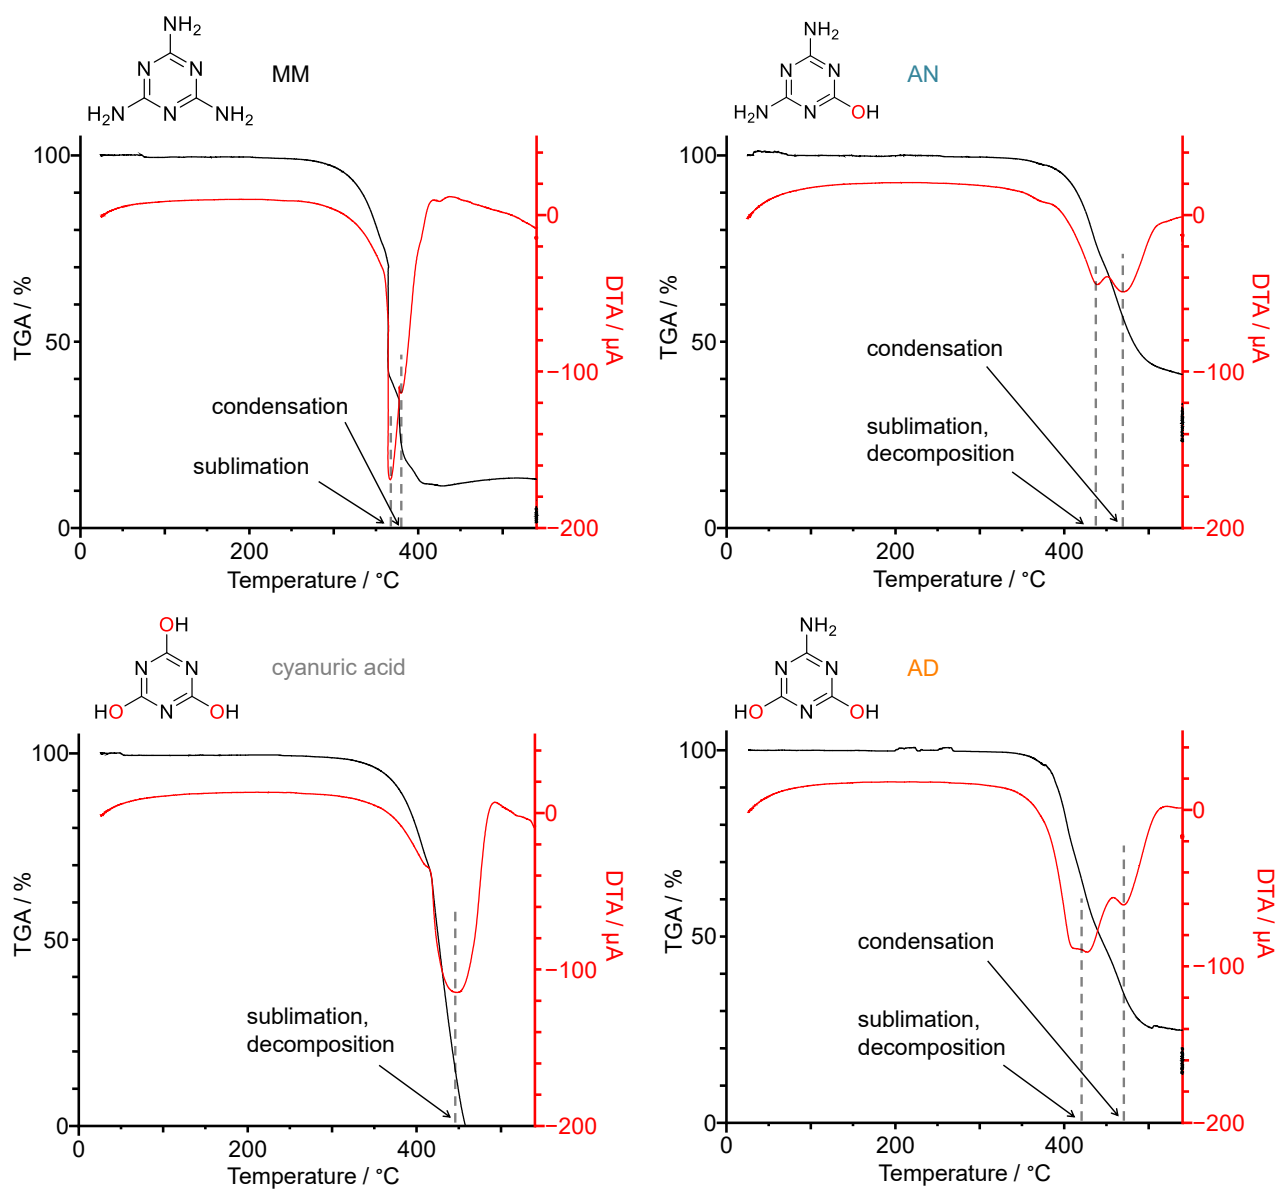

**Fig. S12** TG-DTA curves of respective monomers.



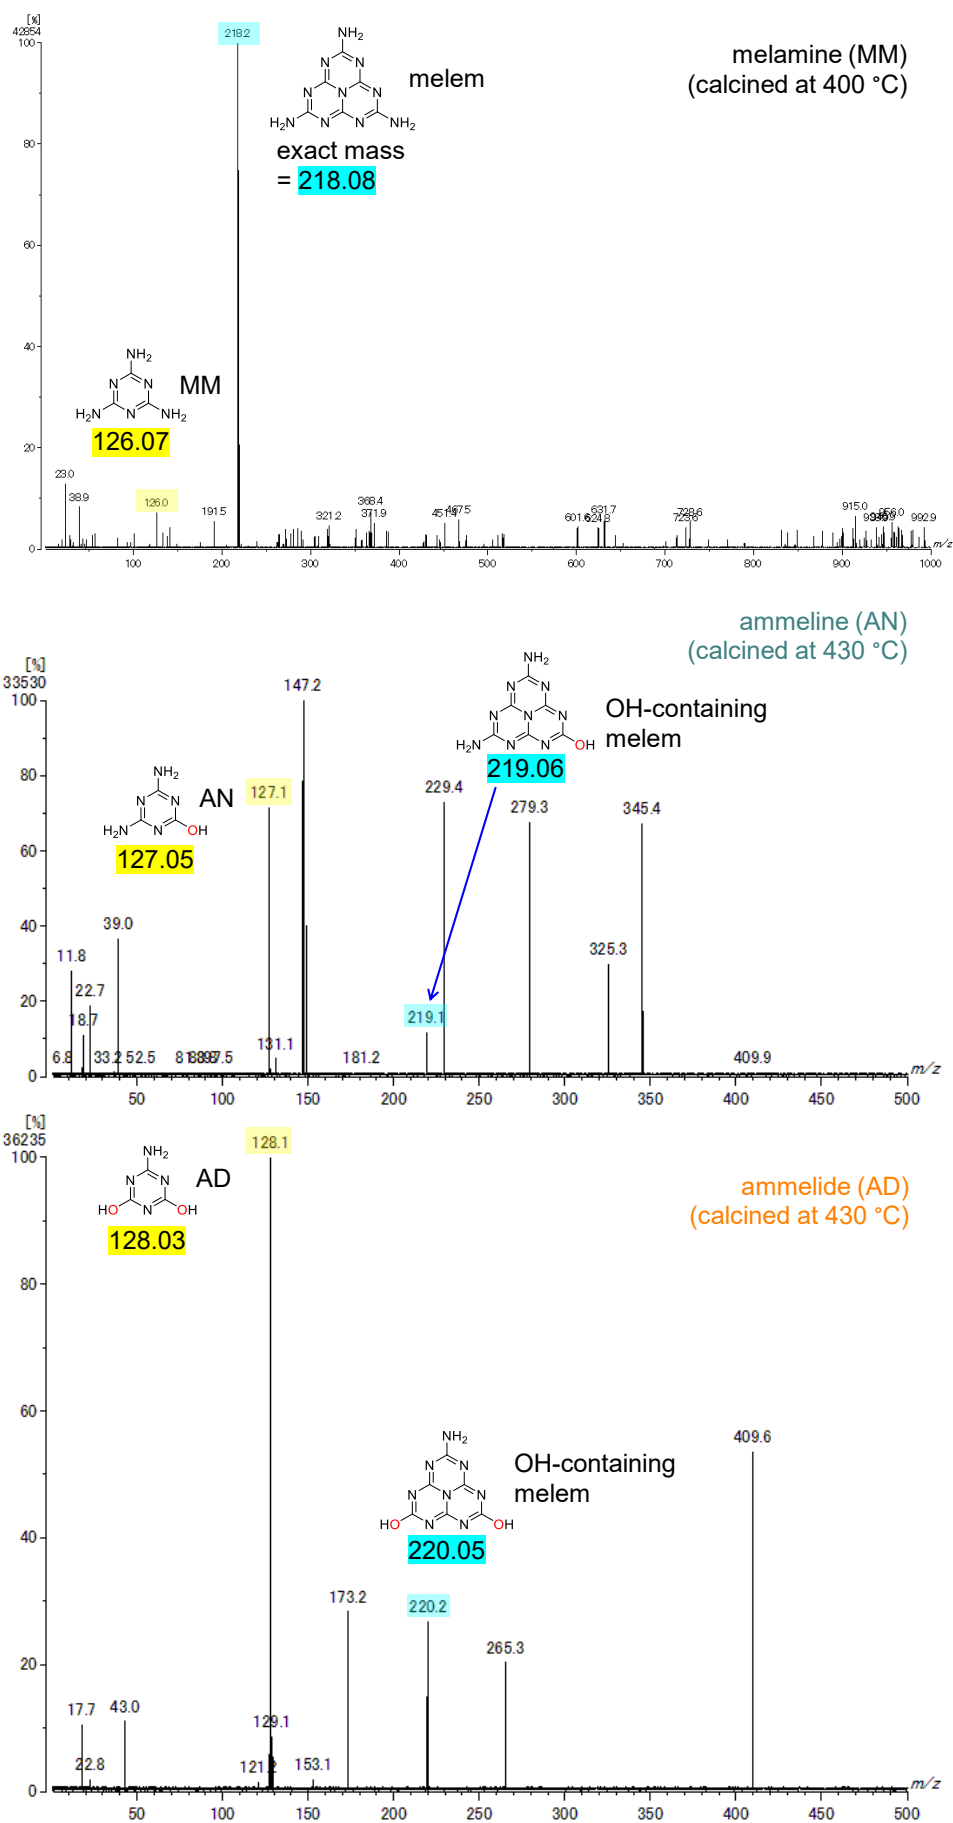

**Fig. S13** FD-MS spectra of the powders obtained by calcination of MM, AN, and AD under N<sub>2</sub> flow (0.2 L min<sup>-1</sup>) with a heating rate of 2 °C min<sup>-1</sup> and a holding time of 3 h (430 °C).

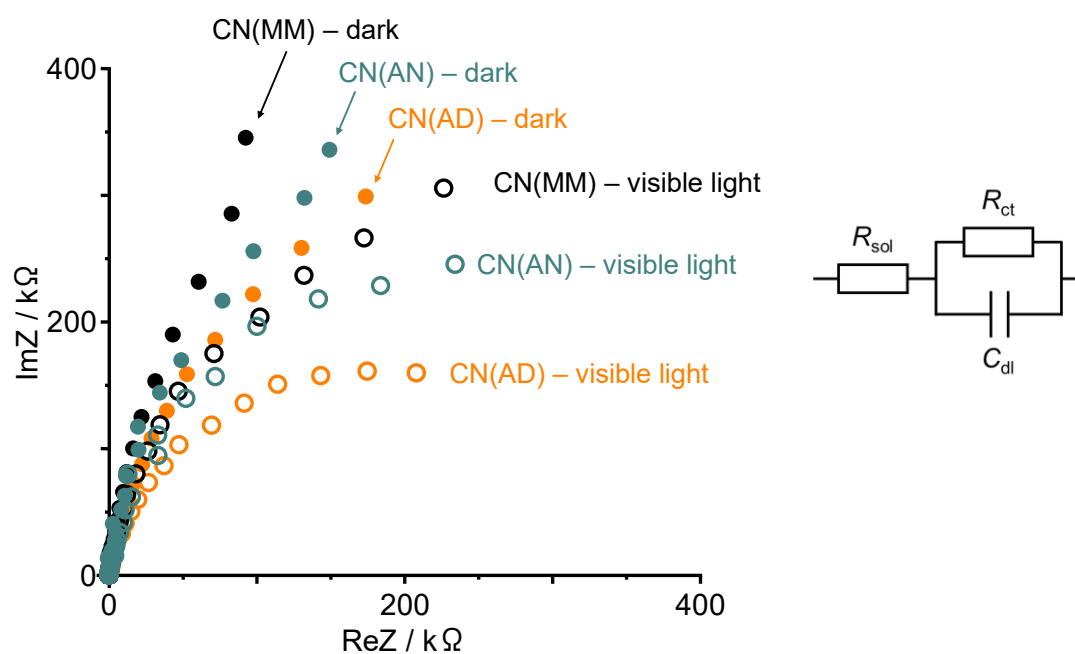

**Fig. S14** EIS Nyquist plots measured on FTO electrodes loaded with respective CN powders.

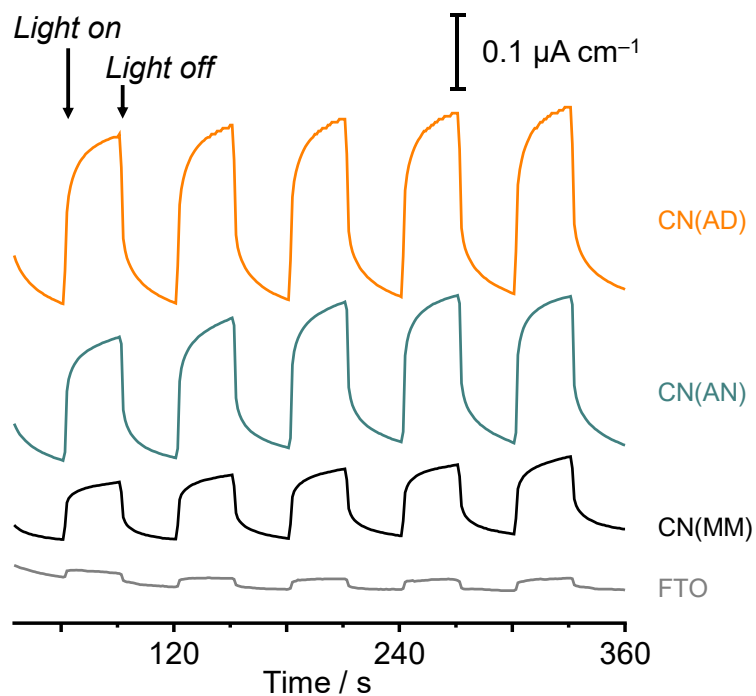

**Fig. S15** Photocurrent response measured on FTO glass loaded with respective CN powders.

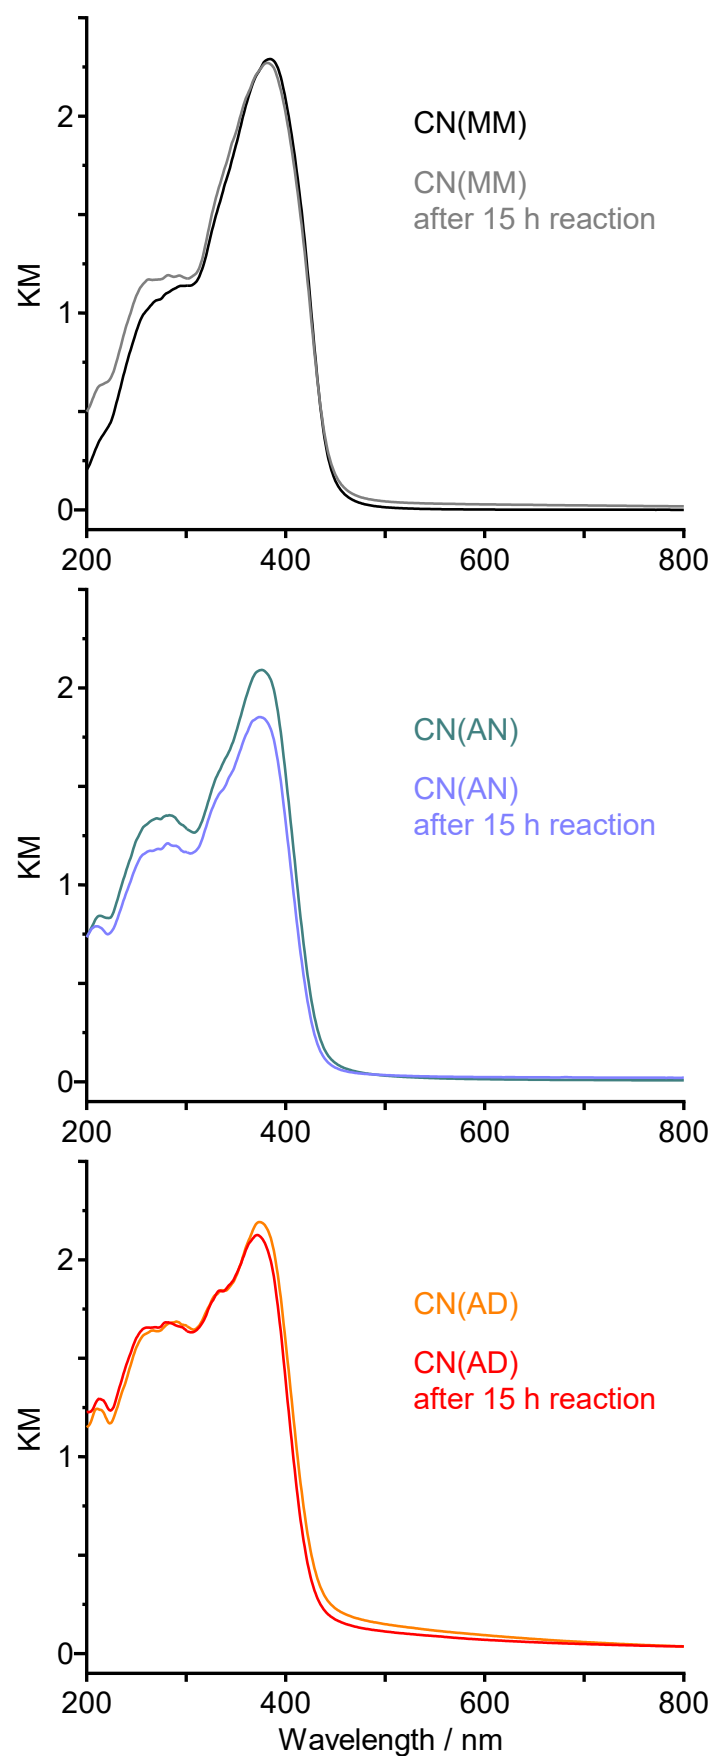

**Fig. S16** DR UV-vis spectra of CN powders before and after 15 h of photoreaction.

**Table S1** Comparison of  $\Phi_{\text{AQY}}$  for photocatalytic  $\text{H}_2$  generation on the reported CN-based catalysts.<sup>[a]</sup>

| Catalyst                                   | Procedure                                                                                                                                                                                     | Sacrificial reagent | $S_{\text{BET}} / \text{m}^2 \text{g}^{-1}$ | $\Phi_{\text{AQY}} / \%$<br>(@ $\lambda / \text{nm}$ ) | Ref.      |
|--------------------------------------------|-----------------------------------------------------------------------------------------------------------------------------------------------------------------------------------------------|---------------------|---------------------------------------------|--------------------------------------------------------|-----------|
| CN(AD)                                     | <b>One step</b><br>Calcination of AD at 550 °C (3 h) under $\text{N}_2$ .                                                                                                                     | 10 vol% TEOA        | 96.1                                        | 4.1<br>(420)                                           | This work |
| mesoporous g- $\text{C}_3\text{N}_4$       | <b>Two steps</b> (hard templating method)<br>Calcination of a mixture of urea and mesoporous silica (SBA-15) at 500 °C (4 h) and removal of SBA-15 using 20 vol% HF.                          | 10 vol% 2-PrOH      | 49.8                                        | 2.7<br>(420)                                           | 8         |
| CCNNSs                                     | <b>Two steps</b> (post treatment)<br>Calcination of g- $\text{C}_3\text{N}_4$ in Al foil at 620 °C (2 h) under Ar.                                                                            | 10 vol% TEOA        | 34                                          | 9.0<br>(420)                                           | 9         |
| g- $\text{C}_3\text{N}_4$ (550) seaweed    | <b>Three steps</b> (pretreatment)<br>Dicyandiamide was hydrothermally treated at 200 °C (4 h). The resultant was left in liquid $\text{N}_2$ . The resultant was calcined at 550 °C under Ar. | 10 vol% TEOA        | 130                                         | 7.8<br>(420)                                           | 10        |
| g- $\text{C}_3\text{N}_4$ nanosheets       | <b>Two steps</b> (post treatment)<br>Ultrasonication of g- $\text{C}_3\text{N}_4$ in 2-PrOH (10 h).                                                                                           | 10 vol% TEOA        | 384                                         | 3.8<br>(420)                                           | 11        |
| 2DPCM                                      | <b>Two steps</b> (pretreatment)<br>Melamine was hydrothermally treated in HCl at 180 °C (10 h). The resultant was calcined at 650 °C (2 h) under $\text{N}_2$ .                               | 10 vol% TEOA        | 50.2                                        | 1.3<br>(490)                                           | 12        |
| TCN-1%CTAC                                 | <b>Two steps</b> (soft templating method)<br>Calcination of melamine with hexadecyl trimethyl ammonium chloride at 550 °C (4 h) and at 500 °C (2 h) under air.                                | 10 vol% TEOA        | 43.8                                        | 3.4<br>(420)                                           | 13        |
| worm-like porous g- $\text{C}_3\text{N}_4$ | <b>Two steps</b> (soft templating method)<br>Calcination of melamine with Pluronic P123 at 600 °C (4 h) under Ar and at 500 °C (2 h) under air.                                               | 10 vol% TEOA        | 90                                          | 1.8<br>(420)                                           | 14        |
| ompg-CN-1                                  | <b>Two steps</b> (hard templating method)<br>Calcination of cyanamide with SBA-15 at 550 °C (4 h) and removal of SBA-15 using 4 M ammonium bifluoride (24 h).                                 | 10 vol% TEOA        | 234                                         | 3.0<br>(455)                                           | 15        |

|           |                                                                                                                                                                                   |                 |      |               |    |
|-----------|-----------------------------------------------------------------------------------------------------------------------------------------------------------------------------------|-----------------|------|---------------|----|
| ompg-CN-2 | <b>Two steps</b> (hard templating method)<br>Calcination of cyanamide with HCl-treated SBA-15 at 550 °C (4 h) followed by removal of SBA-15 using 4 M ammonium bifluoride (24 h). | 10 vol%<br>TEOA | 517  | 6.8<br>(455)  | 15 |
| CNHS      | <b>Two steps</b><br>Calcination of melamine at 500 °C (2 h) and at 520 °C (2 h) under air. The resultant was calcined at 520 °C (6 h) under air.                                  | 10 vol%<br>TEOA | 278  | 4.0<br>(420)  | 16 |
| FCN-5     | <b>Two steps</b> (soft templating method)<br>Dicyandiamide was mixed with polyurethane sponges in solution and concentrated. The resultant was calcined at 550 °C (1 h).          | 10 vol%<br>TEOA | 58.7 | 3.9<br>(420)  | 17 |
| HCN       | <b>Three steps</b> (pretreatment)<br>Dicyandiamide was hydrothermally treated at 160 °C (20 h). The resultant was calcined at 380 °C (1 h) and 500 °C (2 h).                      | 5 vol%<br>MeOH  | 124  | 10.6<br>(420) | 18 |
| CN-AA     | <b>Three steps</b> (pretreatment)<br>Urea was hydrothermally treated at 200 °C (24 h). The resultant was calcined at 400 °C (4 h) under Ar and at 400 °C (2 h) under air.         | 4.8 wt%<br>TEOA | 270  | 20.9<br>(420) | 19 |
| DCN-550   | <b>Two steps</b> (pretreatment)<br>Dicyandiamide was hydrothermally treated at 180 °C (4 h). The resultant was calcined at 550 °C.                                                | 10 vol%<br>TEOA | 226  | 3.0<br>(420)  | 20 |
| UCNs      | <b>Two steps</b> (pretreatment)<br>Melamine was hydrothermally treated at 180 °C (12 h) in sulfuric acid. The resultant was calcined at 550 °C (4 h).                             | 10 vol%<br>TEOA | 180  | 8.4<br>(420)  | 21 |
| MGCN-600  | <b>Two steps</b> (pretreatment)<br>Melamine and cyanuric acid were mixed in DMSO. The resultant was calcined at 600 °C (4 h) under air.                                           | 10 vol%<br>TEOA | 134  | 13.5<br>(400) | 22 |
| CNMS-600  | <b>Two steps</b> (post treatment)<br>CN powder was suspended in concentrated sulfuric acid. The resultant was calcined at 600 °C (2 h) under Ar.                                  | 10 vol%<br>TEOA | 132  | 6.3<br>(420)  | 23 |

[a] Determined using Pt cocatalyst.

## References

- 1 Y. Shiraishi, Y. Ueda, A. Soramoto, S. Hinokuma and T. Hirai, *Nat. Commun.*, 2020, **11**, 3386.
- 2 Y. Shiraishi, M. Matsumoto, S. Ichikawa, S. Tanaka and T. Hirai, *J. Am. Chem. Soc.*, 2021, **143**, 12590–12599.
- 3 J. A. Seabold and K. S. Choi, *J. Am. Chem. Soc.*, 2012, **134**, 2186–2192.
- 4 Y. Shiraishi, T. Takii, T. Hagi, S. Mori, Y. Kofuji, Y. Kitagawa, S. Tanaka, S. Ichikawa and T. Hirai, *Nat. Mater.*, 2019, **18**, 985–993.
- 5 W. Li, Z. Wei, K. Zhu, W. Wei, J. Yang, J. Jing, D. L. Phillips and Y. Zhu, *Appl. Catal. B*, 2022, **306**, 121142.
- 6 Z. Liang, X. Zhuang, Z. Tang, H. Li, L. Liu and W. Kang, *J. Mater. Chem. A*, 2021, **9**, 6805–6810.
- 7 V. W. H. Lau, C. F. Lu, N. Putri Wijaya and M. Lutan, *Chem. Mater.*, 2024, **36**, 9762–9774.
- 8 S. Obregón, A. Vázquez, M. A. Ruíz-Gómez and V. Rodríguez-González, *Appl. Surf. Sci.*, 2019, **488**, 205–212.
- 9 W. Iqbal, B. Qiu, Q. Zhu, M. Xing and J. Zhang, *Appl. Catal. B*, 2018, **232**, 306–313.
- 10 Q. Han, B. Wang, Y. Zhao, C. Hu and L. Qu, *Angew. Chem. Int. Ed.*, 2015, **54**, 11433–11437.
- 11 S. Yang, Y. Gong, J. Zhang, L. Zhan, L. Ma, Z. Fang, R. Vajtai, X. Wang and P. M. Ajayan, *Adv. Mater.*, 2013, **25**, 2452–2456.
- 12 L. Zhang, N. Ding, J. Wu, K. Iwasaki, L. Lin, Y. Yamaguchi, Y. Shibayama, J. Shi, H. Wu, Y. Luo, K. Nakata, D. Li, X. Wang, A. Fujishima and Q. Meng, *Catal. Sci. Technol.*, 2018, **8**, 3846–3852.
- 13 Y. Chen, B. Yang, W. Xie, X. Zhao, Z. Wang, X. Su and C. Yang, *J. Mater. Res. Technol.*, 2021, **13**, 301–310.
- 14 H. Yan, *Chem. Commun.*, 2012, **48**, 3430–3432.
- 15 J. Zhang, F. Guo and X. Wang, *Adv. Funct. Mater.*, 2013, **23**, 3008–3014.
- 16 Y. Li, R. Jin, Y. Xing, J. Li, S. Song, X. Liu, M. Li and R. Jin, *Adv. Energy Mater.*, 2016, **6**, 1601273.
- 17 Y. Li, Z. Ruan, Y. He, J. Li, K. Li, Y. Jiang, X. Xu, Y. Yuan and K. Lin, *Appl. Catal. B*, 2018, **236**, 64–75.
- 18 Q. Liu, X. Wang, Q. Yang, Z. Zhang and X. Fang, *Appl. Surf. Sci.*, 2018, **450**, 46–56.
- 19 N. N. Vu, C. C. Nguyen, S. Kaliaguine and T. O. Do, *ChemSusChem*, 2019, **12**, 291–302.
- 20 M. Wu, Y. Gong, T. Nie, J. Zhang, R. Wang, H. Wang and B. He, *J. Mater. Chem. A*, 2019, **7**, 5324–5332.
- 21 L. Wang, Y. Hong, E. Liu, X. Duan, X. Lin and J. Shi, *Carbon*, 2020, **163**, 234–243.
- 22 J. Huang, Y. Lu, H. Zhang, L. Shangguan, Z. Mou, J. Sun, S. Sun, J. He and W. Lei, *Chem. Eng. J.*, 2021, **405**, 126685.
- 23 Z. Huang, F. Li, B. Chen and G. Yuan, *ChemSusChem*, 2016, **9**, 478–484.
